# Supplementary material for: Measuring the Speed of Aging across Population Subgroups
Source: PLoS One. 2014 May 7;9(5):e96289. doi: 10.1371/journal.pone.0096289 (PMC4012980; doi:10.1371/journal.pone.0096289)
Supplement: Table S1 — Mean hand-grip strength by 5 year age groups from 60–64 to 80–84 by race, gender, and education, for wave 2006, 2008, 2010, 2012. (XLSX) [file pone.0096289.s001.xlsx]

## Sheet: Table S1
Table S1 Mean hand-grip strength by 5 year age groups from 60-64 to 80-84 by race, gender, and education, for wave 2006, 2008, 2010, 2012.
Panel 1: Less Educated White Males 2006
Age	55-59	60-64	65-69	70-74	75-79	80-84
Mean	39.871	38.9727	37.7171	34.4119	32.1003	30.7608
Median	39	38.875	37.375	34	31.75	30.6875
Min	24.125	17	23	11.375	18.625	10.875
Max	61	56.25	55.875	54.625	52.5	53.25
Std. Dev.	9.05771	9.11987	7.32337	8.14524	6.79083	8.01579
Quartile 1	33.5	34.0938	32.25	30	27.8125	25.4375
Quartile 3	46	42.5	42.9688	39.875	37.125	35.25
Panel 2: Less Educated White Males 2008
Age	55-59	60-64	65-69	70-74	75-79	80-84
Mean	38.5379	33.8804	36.3164	35.3649	33.5089	29.4116
Median	38	33.875	36.0625	36.75	33.8125	29.75
Min	23	14.625	19.625	8.25	19.125	15.125
Max	52.25	44.625	57	55.75	44.875	43.5
Std. Dev.	7.40898	8.8575	7.9415	8.41303	6.16252	6.86484
Quartile 1	34.125	29.25	31.125	30.3125	29.25	23.75
Quartile 3	43.5	41.6875	41.4375	40.5625	38.7188	33.5
Panel 3: Less Educated White Males 2010
Age	55-59	60-64	65-69	70-74	75-79	80-84
Mean	39.0028	35.7578	35.6469	34.0605	32.3921	28.8773
Median	38.5	37.875	35.875	34.1875	31.625	29.625
Min	23.875	20.125	14.625	12.75	20.5	14.125
Max	53.625	54.75	49.5	52.25	49.625	49.25
Std. Dev.	6.99754	9.10938	6.42729	8.57582	6.67626	7.40868
Quartile 1	36.075	28.1875	32.4062	28.9062	28.5	22.6875
Quartile 3	42.6562	42.4375	39.75	39.0375	37.25	32.825
Panel 4: Less Educated White Males 2012
Age	55-59	60-64	65-69	70-74	75-79	80-84
Mean	38.4215	35.4632	34.8352	31.5596	30.1863	29.4163
Median	37	36.5625	32.75	31.5	30	29.125
Min	23	13.25	21.75	14.25	6.5	17.625
Max	56.25	55.625	48.125	45.25	49.125	41.375
Std. Dev.	8.19984	10.0778	7.25271	7.51142	7.89622	5.82217
Quartile 1	33.0625	29.8125	29.8125	26.375	25.4375	24.5625
Quartile 3	43.5625	41.3438	40.3438	37.125	36	34.25
Panel 5: Less Educated White Females 2006
Age	55-59	60-64	65-69	70-74	75-79	80-84
Mean	23.9	21.0797	22.1811	21.122	19.995	17.8794
Median	24.75	21.5	21.6875	21.5	19.875	18.125
Min	4.875	4.375	10.125	8.375	5.25	7.5
Max	34.125	33.875	36.125	32.75	32.375	28.125
Std. Dev.	6.74038	5.70898	5.06295	4.53564	4.48597	4.33502
Quartile 1	21.125	18.0312	19.2812	18.0625	17.1875	15
Quartile 3	28.5625	25.0312	25.875	24.125	22.9375	20.5
Panel 6: Less Educated White Females 2008
Age	55-59	60-64	65-69	70-74	75-79	80-84
Mean	23.005	22.8944	21.3528	19.9393	18.5199	17.3074
Median	22.625	22.5	21.125	19.75	18.625	16.625
Min	11.875	13.375	4.625	6	6.375	7.875
Max	42.25	32.25	39.25	37.25	29.125	26.5
Std. Dev.	6.38772	4.60144	6.34329	5.48796	4.27981	3.90123
Quartile 1	19.375	20.25	17.0625	16.625	15.2188	14.375
Quartile 3	26.6875	25.875	26.125	23.875	20.875	20.25
Panel 7: Less Educated White Females 2010
Age	55-59	60-64	65-69	70-74	75-79	80-84
Mean	24.2835	22.0861	21.4387	20.6709	18.6116	18.65
Median	24.4375	21.875	22.125	21	18.625	18.325
Min	10.625	10.875	7	7.625	5.875	8.375
Max	35.25	31.875	31.25	34.125	25.875	29.75
Std. Dev.	5.52384	5.03543	5.05419	5.08479	4.18493	4.65156
Quartile 1	21.9375	18.875	18.0938	16.75	16.5	15.625
Quartile 3	27.9062	25.75	24.1875	24	21.5625	21.625
Panel 8: Less Educated White Females 2012
Age	55-59	60-64	65-69	70-74	75-79	80-84
Mean	23.7066	21.433	22.0488	19.6099	18.1951	16.4464
Median	23.375	21.625	22	19.625	18.375	16.6875
Min	13.25	7	9.5	3.375	5.375	8.5
Max	37.75	39.25	32.875	32.25	32.125	25.25
Std. Dev.	5.0757	6.48311	4.96298	5.25898	5.47413	3.50088
Quartile 1	20.375	17.5	18.875	16.9375	14.8438	14.4375
Quartile 3	26.125	26.1875	24.625	23	21.9688	18.6875
Panel 9: Less Educated African-American Males 2006
Age	55-59	60-64	65-69	70-74	75-79	80-84
Mean	39.5417	39.8	37.4375	37.38	30.6346	27.8125
Median	36.875	39.75	36.625	37.375	29.125	26.25
Min	32.125	22.125	18.625	21.75	16.75	18.25
Max	51.75	51.125	56.875	50.25	55	41.875
Std. Dev.	6.22087	11.1034	10.5067	6.50676	9.49225	7.07217
Quartile 1	35.75	39	30.375	33.875	26	24.6562
Quartile 3	40.5	47	44.2188	39.875	34.5	30.1875
Panel 10: Less Educated African-American Males 2008
Age	55-59	60-64	65-69	70-74	75-79	80-84
Mean	43.1562	41.5278	38.9474	36.1688	31.075	26.6458
Median	44.5	44	39.25	35.3125	30.875	27.4375
Min	34	29.75	21	20.5	14.375	7.75
Max	53.125	52.125	54.625	58	41	36.25
Std. Dev.	6.76544	8.07334	9.83424	9.74471	7.38858	7.81985
Quartile 1	37.625	32.625	35.625	29.375	26.625	25.3125
Quartile 3	47.7812	47.125	44.4375	42.4062	37.5625	31.8125
Panel 11: Less Educated African-American Males 2010
Age	55-59	60-64	65-69	70-74	75-79	80-84
Mean	40.496	37.5263	36.5083	34.2845	31.681	34.1063
Median	41.75	36.875	38.5	34	31.625	30.8125
Min	17.75	25.5	17.125	23.125	22.375	22.8
Max	57.25	54.625	46.5	48.375	45.375	52
Std. Dev.	7.59533	7.74906	7.89743	6.27432	6.19555	12.9193
Quartile 1	35.625	30.875	31.9375	29.875	26.625	25.8562
Quartile 3	44.9375	42.6875	42.625	37.375	34.875	39.0625
Panel 12: Less Educated African-American Males 2012
Age	55-59	60-64	65-69	70-74	75-79	80-84
Mean	38.4239	35.7596	41.5568	34.0238	30.7941	28.1417
Median	38.25	35.625	42.125	35.875	31.625	27.875
Min	24	22.875	25.25	9.375	16.625	16.75
Max	56.75	43.625	53.125	46.125	46.625	38.125
Std. Dev.	9.36975	5.87532	7.03526	9.63762	8.574	6.45224
Quartile 1	32.5	32.75	40.375	28.875	22.125	25.125
Quartile 3	43.75	39.875	43.75	39.625	35.375	32.9375
Panel 13: Less Educated African-American Females 2006
Age	55-59	60-64	65-69	70-74	75-79	80-84
Mean	26.0658	24.983	24.4967	24.707	21.4946	20.2422
Median	26.5	26.3125	25.0625	25.25	21.25	20.8125
Min	13.375	14.25	5.875	10.625	13.5	12.625
Max	39.875	33.5	37.75	35.75	28.625	27.875
Std. Dev.	6.71317	5.12308	6.2203	6.02135	4.0607	4.9258
Quartile 1	22.5625	22.9688	20.6875	21.4688	19.5	16.0312
Quartile 3	30.5	27.4375	27.75	28.8125	23.6875	24.2188
Panel 14: Less Educated African-American Females 2008
Age	55-59	60-64	65-69	70-74	75-79	80-84
Mean	21.7292	22.25	23.1172	23.8841	23.1576	17.9519
Median	20.8125	23.125	23.5	24.625	25.25	18.625
Min	12.5	13.375	11.625	11.875	6.875	6.75
Max	31	29.25	35.125	33.875	32.5	25.75
Std. Dev.	6.22879	4.7523	5.39806	4.94733	6.89864	5.14365
Quartile 1	17.6875	19.3125	19.625	20.75	19.4375	14.75
Quartile 3	28	26.0625	26.3125	26.75	28.6875	21.125
Panel 15: Less Educated African-American Females 2010
Age	55-59	60-64	65-69	70-74	75-79	80-84
Mean	24.6094	24.2529	23.7306	23.061	21.9239	17.5521
Median	24.875	24	24.5	22.25	22.625	18.125
Min	2.925	12.125	11.375	16.75	15	8.125
Max	39	36.875	31.375	33.75	29.5	27.5
Std. Dev.	7.68993	5.99878	5.26355	4.54697	4.62742	5.43073
Quartile 1	19.75	20.55	22.2188	19.875	17.5625	14.4375
Quartile 3	30.875	28.5625	27.1875	26.5	26.5	21.0312
Panel 16: Less Educated African-American Females 2012
Age	55-59	60-64	65-69	70-74	75-79	80-84
Mean	23.8036	24.2672	23.1016	20.5231	22.8472	20.0481
Median	24.25	24.125	23	22.125	22.625	19.625
Min	6.5	16.5	13.25	9.5	15.375	13.625
Max	42.5	33.125	31.125	30.75	35.375	29.75
Std. Dev.	6.89701	4.52408	4.52843	5.43327	5.27824	4.82467
Quartile 1	19.6562	22	20.9062	17	19	16.875
Quartile 3	28.5312	26.625	26.1875	24	25.3125	22.5
Panel 17: More Educated White Males 2006
Age	55-59	60-64	65-69	70-74	75-79	80-84
Mean	43.818	42.352	39.492	37.8798	34.9204	31.7965
Median	44	42.875	39.5	37.8125	34.9375	32.0625
Min	14.5	6.625	19.125	15.5	16.25	15.25
Max	64.625	71.75	58.5	57.125	55	58.875
Std. Dev.	8.29055	8.49183	7.56662	7.22246	7.23315	7.06219
Quartile 1	38.75	37.125	34.5	33.25	30.2188	26.9688
Quartile 3	48.75	47.7188	45	42.7188	39.75	36.625
Panel 18: More Educated White Males 2008
Age	55-59	60-64	65-69	70-74	75-79	80-84
Mean	43.6186	42.0087	38.3459	35.8928	33.1538	29.401
Median	43.1875	42.25	38.5625	35.75	33.75	29.25
Min	20.75	13.25	18.625	5	10.375	13
Max	72.5	68.125	56	54.125	51.625	51.625
Std. Dev.	8.68537	8.47768	7.30049	7.46995	7.08937	6.82162
Quartile 1	38.0938	36.4375	33.625	31.3438	28.25	25.1562
Quartile 3	49.25	48.0625	43.625	40.5312	38.375	33.5
Panel 19: More Educated White Males 2010
Age	55-59	60-64	65-69	70-74	75-79	80-84
Mean	42.6668	40.8445	39.5634	36.6733	34.4204	30.8317
Median	43.0625	41.25	40.125	35.8375	34.3125	30.25
Min	5.675	12.125	19.5	15.375	10.75	13.25
Max	64.75	60.25	65.875	55.125	53.875	52.5
Std. Dev.	8.86103	7.86462	7.73636	6.91422	7.97464	7.33725
Quartile 1	37.125	35.9688	34.8125	31.9062	29.625	25.6875
Quartile 3	48.25	46.375	44.75	41.8438	39.6875	36
Panel 20: More Educated White Males 2012
Age	55-59	60-64	65-69	70-74	75-79	80-84
Mean	41.9887	40.7251	38.732	34.869	33.2864	29.6072
Median	42	40.75	39.75	35.125	33.625	30.875
Min	5.75	9.75	11.75	15.625	12.25	12.125
Max	67.25	63.625	63.375	56	49.75	46.125
Std. Dev.	8.75167	8.59712	8.3358	7.02459	7.05096	7.18609
Quartile 1	37.0938	34.875	33.25	30.1875	29	24.0625
Quartile 3	48.1562	45.8125	44.375	39.625	37.9688	34.0625
Panel 21: More Educated White Females 2006
Age	55-59	60-64	65-69	70-74	75-79	80-84
Mean	26.2765	24.9679	23.1832	21.8949	20.0994	17.8174
Median	26.375	25.1875	23.25	22.125	20	17.75
Min	11.5	8.5	7.125	4.625	8.875	5.625
Max	39	39	36.625	36.875	36.875	30.625
Std. Dev.	5.02031	5.18608	4.81546	4.74593	4.59671	4.4014
Quartile 1	22.75	21.0312	20	18.875	17.25	15
Quartile 3	29.75	28.4688	26.4062	25	23	20.375
Panel 22: More Educated White Females 2008
Age	55-59	60-64	65-69	70-74	75-79	80-84
Mean	25.9224	24.6709	23.1087	21.9221	19.5012	17.7668
Median	26.25	24.5625	23.25	21.875	20	17.6875
Min	7.25	8.25	5.625	7.25	6.125	5.75
Max	40.625	41.5	47.125	36.25	36.5	31
Std. Dev.	4.96125	5.27308	5.43689	4.76954	4.78495	4.35335
Quartile 1	22.8438	21.5938	19.8125	18.875	16.125	15.0312
Quartile 3	29	27.875	26.25	25.25	22.6875	20.5
Panel 23: More Educated White Females 2010
Age	55-59	60-64	65-69	70-74	75-79	80-84
Mean	25.5663	24.9596	23.343	21.4268	19.6244	18.4535
Median	26	25	23.625	21.75	19.375	18.4375
Min	7.5	7.875	6.25	4.75	8.125	6.625
Max	44.125	38.75	41	34.875	34	30.25
Std. Dev.	5.75518	4.93049	5.19736	4.75551	4.70168	4.5578
Quartile 1	22.375	21.75	19.875	18.75	16.5437	15.125
Quartile 3	29.5	28.25	26.625	24.4375	22.5938	21.4688
Panel 24: More Educated White Females 2012
Age	55-59	60-64	65-69	70-74	75-79	80-84
Mean	25.3295	24.368	22.8649	20.875	19.792	17.1546
Median	25.125	24.1875	22.75	20.875	19.5625	17.3125
Min	8	7.875	6.625	5.25	7.25	5.125
Max	50.75	38.125	38.125	34.875	32.75	28.25
Std. Dev.	5.40675	5.10448	5.42868	4.90892	4.50767	4.15669
Quartile 1	22.125	21.125	19.25	17.625	16.7188	14.375
Quartile 3	28.5312	28	26.5312	24	22.875	19.875
Panel 25: More Educated African-American Males 2006
Age	55-59	60-64	65-69	70-74	75-79	80-84
Mean	41.6982	40.8879	38.7237	35.225	34.1731	28.4722
Median	41.875	41.125	40.8125	35.75	37.5	27.625
Min	23.5	25.375	22.5	17.875	20.5	24.875
Max	57.125	53.75	59	49.75	41.125	39.375
Std. Dev.	7.99956	7.0496	9.32345	7.46387	6.36202	4.38872
Quartile 1	36.625	35	31.2188	30.6875	31.375	25.625
Quartile 3	46.25	46.125	45.1875	39.375	38.375	29.125
Panel 26: More Educated African-American Males 2008
Age	55-59	60-64	65-69	70-74	75-79	80-84
Mean	42.6685	36.5292	37.2656	35.1654	30.2414	31.7857
Median	42.3125	38.625	37.875	34.875	31.125	32.25
Min	20.5	9	14	14.75	10.375	24.375
Max	64.625	53.25	54.5	54.375	49	42
Std. Dev.	9.07328	11.0602	8.02659	8.38496	8.66025	5.98162
Quartile 1	37.0312	31.8125	32.9375	29.75	24.375	28.25
Quartile 3	47.5625	43.3125	41.7188	40.5312	35	33.6875
Panel 27: More Educated African-American Males 2010
Age	55-59	60-64	65-69	70-74	75-79	80-84
Mean	40.0609	38.7457	39.6667	34.5428	34.6313	30.3523
Median	40.875	39	39.75	35.375	33.1875	30.75
Min	18.75	17.125	25.375	17.75	23.125	19.5
Max	60	54.5	49.75	49.75	45.75	35.75
Std. Dev.	8.95476	8.02691	6.26293	8.27404	6.18299	4.63877
Quartile 1	34.2375	32.625	35.625	30.1562	30.0312	29.4375
Quartile 3	45.0312	43.75	44.375	39.5	39.7812	33.4375
Panel 28: More Educated African-American Males 2012
Age	55-59	60-64	65-69	70-74	75-79	80-84
Mean	40.1754	38.4735	34.575	33.5882	32.665	31.0417
Median	40.5	39.25	37.75	33.125	32.25	31.375
Min	17.125	6.625	13.75	19.125	21	16.5
Max	57.5	61.625	51.125	47.75	42.75	42.125
Std. Dev.	7.77569	9.57491	10.1491	7.22393	5.76749	8.77607
Quartile 1	35.625	32.875	27.6562	28.4062	29	27.75
Quartile 3	45.625	44.9375	41.2188	39.2812	35.25	38.875
Panel 29: More Educated African-American Females 2006
Age	55-59	60-64	65-69	70-74	75-79	80-84
Mean	26.5019	26.0504	23.4173	22.3443	23.7339	19.5268
Median	26.6875	26.375	23.875	22.25	24	18.625
Min	11.5	8	13.375	11.5	10.625	11
Max	44.25	42.5	32.625	31.625	33.625	28.125
Std. Dev.	6.18184	6.42144	4.5195	4.45557	5.37953	5.11812
Quartile 1	21.6562	21.375	19.875	18.75	21.8125	15.7812
Quartile 3	30.5	30	27.125	24.625	27.125	23.4688
Panel 30: More Educated African-American Females 2008
Age	55-59	60-64	65-69	70-74	75-79	80-84
Mean	28.0489	25.0184	25.1793	23.9167	22.3567	18.7596
Median	28.25	25	25.125	23.5	23	19.25
Min	9.25	5.875	11	5.75	13.25	11.875
Max	49	43.625	35.875	39.25	33.625	25.5
Std. Dev.	6.44634	6.58118	5.01628	5.81851	4.99027	4.89378
Quartile 1	25.5	20.5	22.8125	21.375	18.125	13.25
Quartile 3	31.125	29.5	28.6562	27	25.5	22.625
Panel 31: More Educated African-American Females 2010
Age	55-59	60-64	65-69	70-74	75-79	80-84
Mean	26.2463	24.3396	23.8242	22.4746	21.7895	20.2857
Median	26.125	24.75	25.125	22.375	22.375	19.125
Min	7.5	5.5	11.75	11.625	12	11.25
Max	46.125	41.875	34.5	34.125	29.5	31.25
Std. Dev.	5.99032	6.10439	5.17554	4.93244	4.65736	4.87053
Quartile 1	22.7812	20.875	19.4375	18.5625	18.4375	17.125
Quartile 3	29.4688	27.8875	27.875	25.4688	25.7188	21.75
Panel 32: More Educated African-American Females 2012
Age	55-59	60-64	65-69	70-74	75-79	80-84
Mean	25.4221	24.1604	24.9614	23.5017	21.625	18.632
Median	26	25.25	24.875	23.625	21.5625	18.625
Min	7.375	10	13.5	13.25	7.125	11.75
Max	39.5	36.75	36.125	31.75	29.875	28
Std. Dev.	5.79127	5.97407	5.52985	4.10573	5.13226	4.652
Quartile 1	21.625	19.3125	21.1875	21.25	18.1875	14.75
Quartile 3	29.2188	28.5	28.625	26.75	25.8438	21.125
