# Supplementary material for: Measuring the Speed of Aging across Population Subgroups
Source: PLoS One. 2014 May 7;9(5):e96289. doi: 10.1371/journal.pone.0096289 (PMC4012980; doi:10.1371/journal.pone.0096289)
Supplement: Table S2 — Data on the independent variables used in the panel regressions. (XLSX) [file pone.0096289.s002.xlsx]

## Sheet: Sheet1
Table S2 Data on the independent variables used in the panel regressions.
sex	race	variable	mean	median	min	max	std. dev.	quartile 1	quartile 3
males	white	weight	195.081	191.5	91.5	307.8	35.0601	170.4	216.2
females	white	weight	162.292	157.4	71	318.4	36.2293	136.2	183
males	African American	weight	194.825	192	96.4	314.8	39.3516	167.1	220.35
females	African American	weight	181.003	178	77.5	312	39.7411	152.5	206.6
males	white	height	68.3901	68.5	53.5	78	2.95363	66.5	70.25
females	white	height	62.7576	62.75	50	88.5	2.77079	61	64.5
males	African American	height	68.7158	68.75	50	87	3.07492	67	70.75
females	African American	height	63.3272	63.5	50	88.75	2.8158	61.75	65
males	white	age	69.9333	70	55	90	9.05234	62	77
females	white	age	69.9684	70	55	90	9.11749	62	77
males	African American	age	66.5965	65	55	90	8.6336	59	73
females	African American	age	66.761	66	55	90	8.68858	59	73
males	white	age^2	4972.6	4900	3025	8100	1279.32	3844	5929
females	white	age^2	4978.7	4900	3025	8100	1294.04	3844	5929
males	African American	age^2	4509.58	4225	3025	8100	1189.29	3481	5329
females	African American	age^2	4532.49	4356	3025	8100	1202.31	3481	5329
Number of Observations By Education
		African American	white
high ed.	females	1603	8802
	males	959	7130
low ed.	females	640	1751
	males	424	1264
