# Supplementary material for: Measuring the Speed of Aging across Population Subgroups
Source: PLoS One. 2014 May 7;9(5):e96289. doi: 10.1371/journal.pone.0096289 (PMC4012980; doi:10.1371/journal.pone.0096289)
Supplement: Table S3 — Hand-grip strength based ages with and without weights by 5 year age groups by race, gender, and education for 2006. (XLSX) [file pone.0096289.s003.xlsx]

## Sheet: Sheet1
Table S3 Hand-grip strength based ages with and without weights by 5 year age groups by race, gender, and education for 2006.
Without Weights
Age (Less Educated)	Whites - More Educated		African Americans - More Educated
	Male	Female	Male	Female
60	65.3 (62.4,68.3)	65.4 (62.5,68.1)	59.2 (52.0,66.8)	59.9 (52.2,66.8)
65	69.0 (66.8,71.4)	68.6 (66.5,70.6)	63.7 (57.3,69.4)	64.2 (57.6,69.8)
70	72.8 (71.0,74.6)	72.0 (70.2,73.5)	68.5 (63.6,73.2)	68.8 (63.5,73.8)
75	76.7 (75.1,78.3)	75.4 (73.7,76.9)	73.3 (68.6,78.9)	73.4 (68.4,79.1)
80	80.6 (78.7,82.6)	78.8 (76.9,80.8)	78.1 (72.5,85.0)	78.1 (71.9,85.6)
With Weights
Age (Less Educated)	Whites - More Educated		African Americans - More Educated
60	64.6 (61.9,67.2)	65.4 (62.8,68.1)	62.7 (56.4,68.2)	60.0 (52.4,67.0)
65	68.5 (66.4,70.5)	68.8 (66.8,71.0)	66.6 (62.1,71.3)	64.8 (58.4,70.6)
70	72.3 (70.7,74.0)	72.4 (70.5,74.1)	70.6 (66.4,75.3)	69.6 (64.3,75.3)
75	76.3 (74.6,78.1)	76.0 (74.1,77.8)	74.6 (70.2,80.5)	74.5 (68.7,81.8)
80	80.3 (78.2,82.6)	79.6 (77.5,81.9)	78.6 (73.3,86.2)	79.2 (72.3,87.5)
